# Supplementary material for: Function of FT in Flowering Induction in Two Camellia Species
Source: MDPI journal article supplement (doi:10.3390/plants13060784), 2024-03-10
Supplement: s1 [file s1]

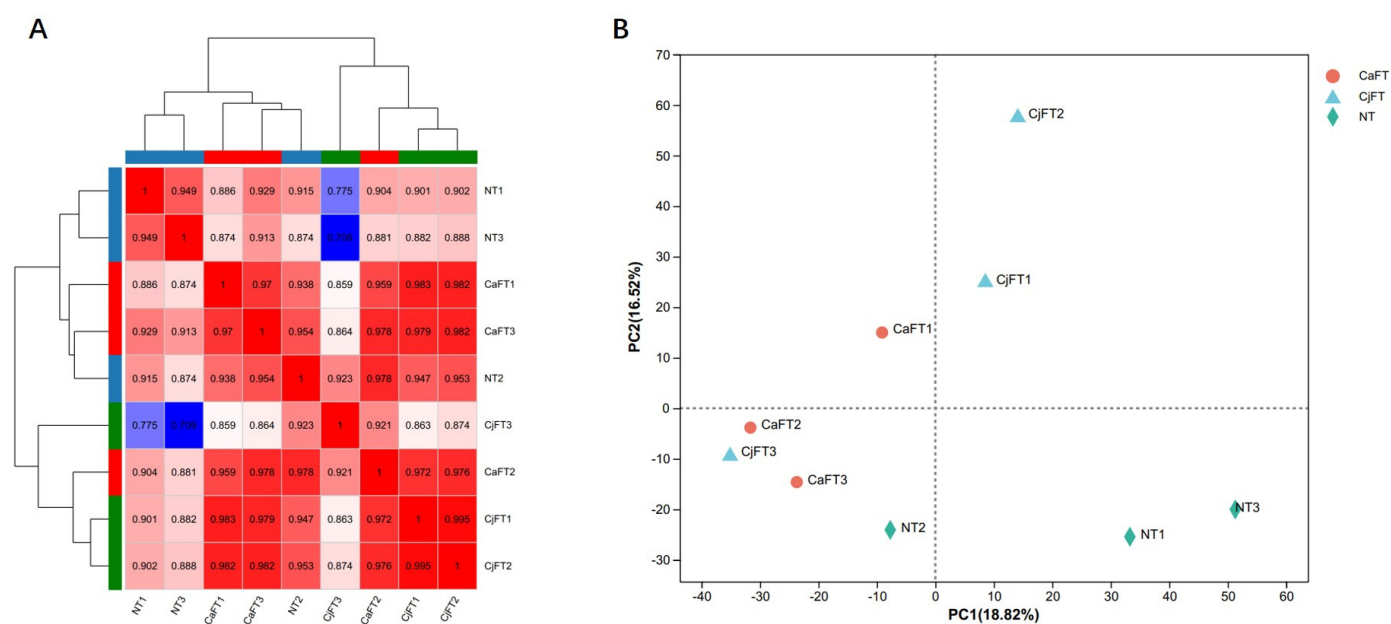

**Supplementary Figure 1. The correlation analysis and principal component analysis between the samples A. Heat map of correlation. B. The principal component analysis between the samples.**

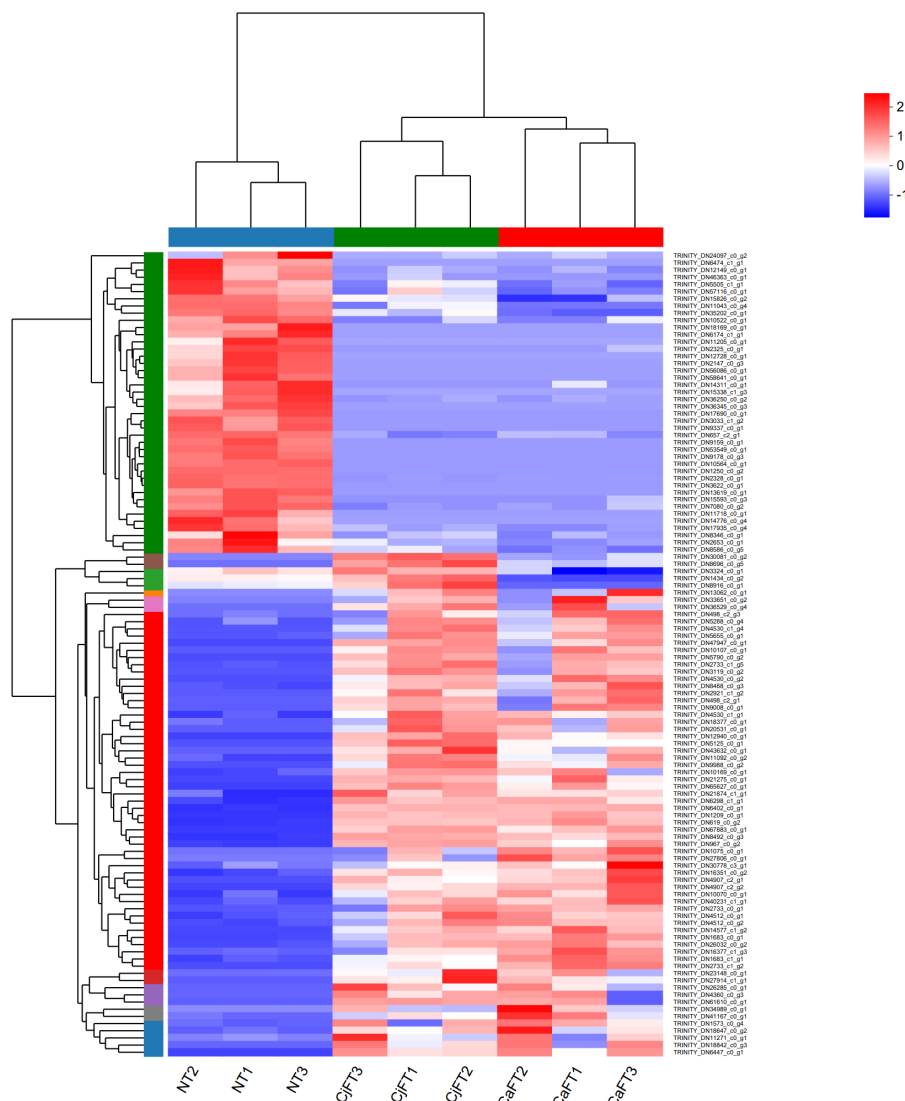

Supplementary Figure 2. Heat map of 67 DEGs with Log2 FC exceeding 5 and 45 ones less than -5 between CaFT/CjFT and NT
